# Supplementary material for: Feeding Entrainment of the Zebrafish Circadian Clock Is Regulated by the Glucocorticoid Receptor
Source: MDPI journal article supplement (doi:10.3390/cells8111342), 2019-10-29
Supplement: s1 [file s1]

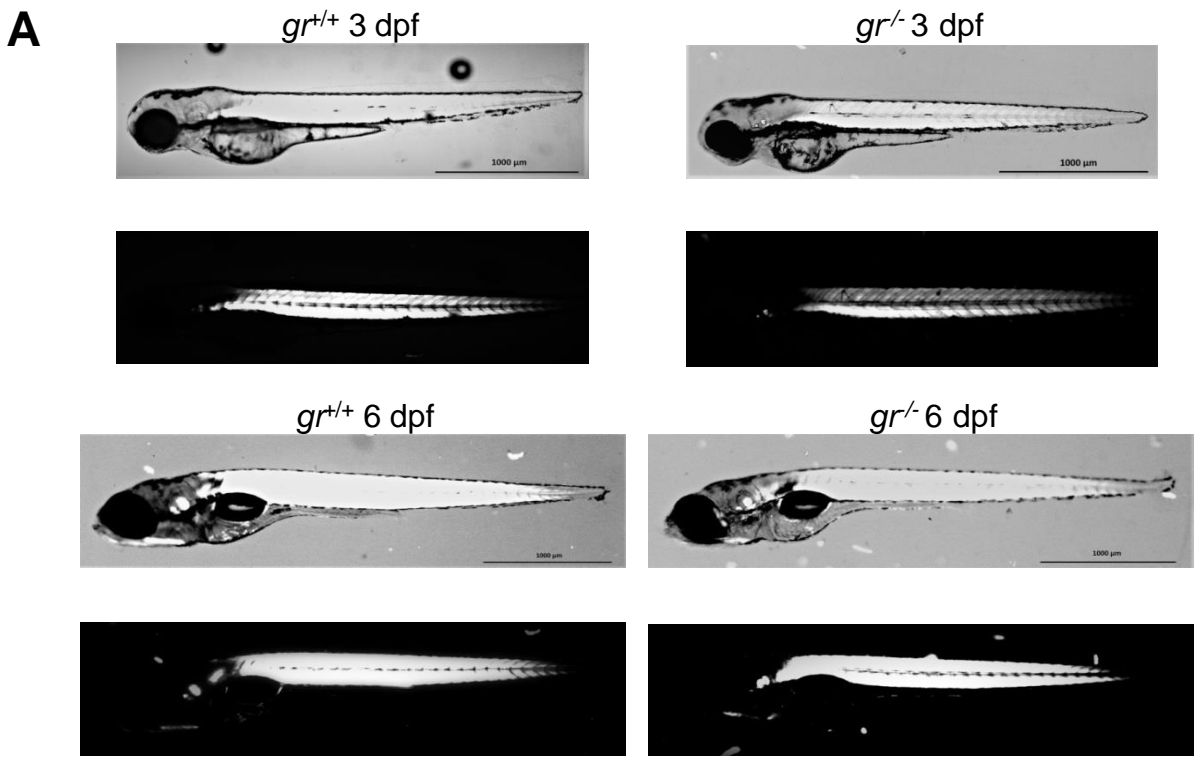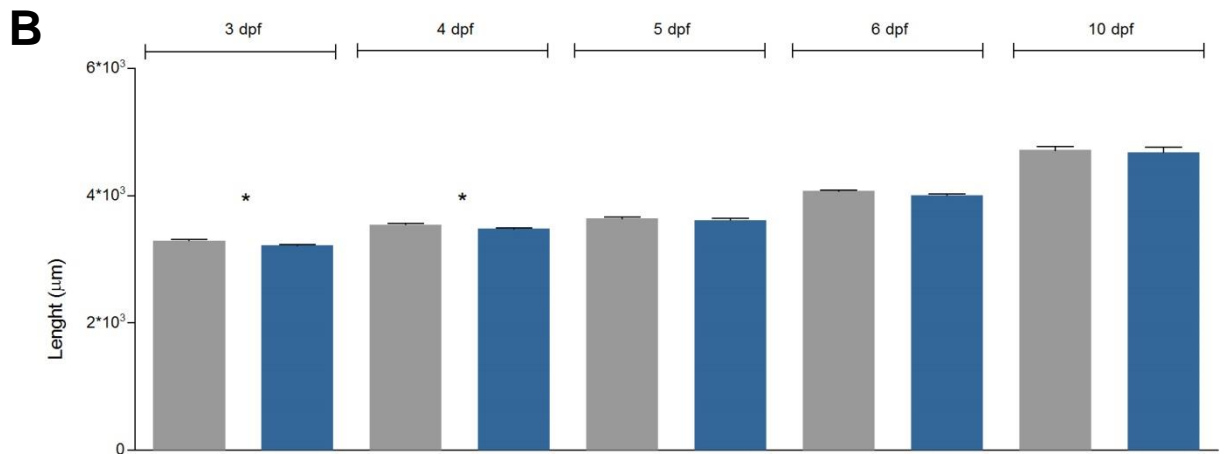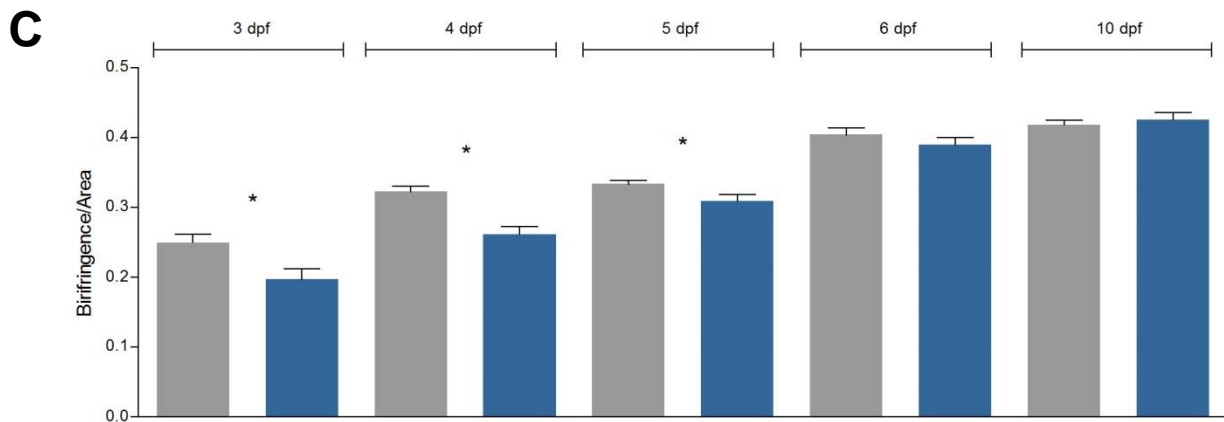

**Figure S1**

(A) Representative images under normal and polarized light of 3 and 6 dpf live *gr*<sup>+/+</sup> and *gr*<sup>-/-</sup> larvae. Under polarized light, the muscle of *gr*<sup>+/+</sup> 3 dpf siblings appears brighter than that of *gr*<sup>-/-</sup> at the same age due to a reduction in birefringence. (B) Body length analysis of both genotypes between 3 to 10 dpf. Data presented as mean ± SEM. (C) Quantification of embryo trunk muscles birefringence showing a statistically significant reduction in *gr*<sup>-/-</sup> at 3, 4 and 5 dpf. The birefringence is similar at 6 and 10 dpf. \* = p<0.05.
