# Supplementary material for: Feeding Entrainment of the Zebrafish Circadian Clock Is Regulated by the Glucocorticoid Receptor
Source: MDPI journal article supplement (doi:10.3390/cells8111342), 2019-10-29
Supplement: s1 [file s1]

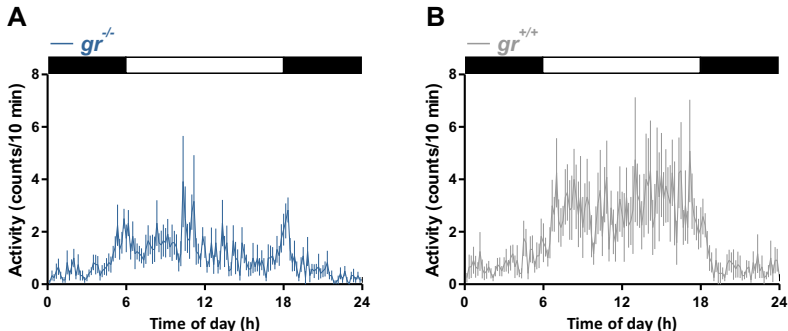

**Figure S2.**

Mean waveforms of  $gr^{-/-}$  (A) and  $gr^{+/+}$  (B) zebrafish entrained to LD cycle are represented. Each point in the mean waveform has been calculated as the mean  $\pm$  SEM from 10 min binned data across all LD1 cycle (12 days) shown on actograms from Fig. 5.
