# Supplementary material for: Feeding Entrainment of the Zebrafish Circadian Clock Is Regulated by the Glucocorticoid Receptor
Source: MDPI journal article supplement (doi:10.3390/cells8111342), 2019-10-29
Supplement: s1 [file s1]

**Table S2**  
**Statistical analysis**

| Larvae – Light entrainment |                          |    |                          |    |
|----------------------------|--------------------------|----|--------------------------|----|
| 5 dpf                      |                          |    |                          |    |
|                            | <i>gr</i> <sup>+/+</sup> |    | <i>gr</i> <sup>-/-</sup> |    |
|                            | P                        | A  | P                        | A  |
| <i>arntl1</i>              | <0.00001                 | 9  | <0.00001                 | 15 |
| <i>clock1a</i>             | <0.00001                 | 15 | <0.00001                 | 15 |
| <i>per1b</i>               | 0.007                    | 3  | <0.00001                 | 3  |
| <i>per2</i>                | 0.003                    | 3  | -                        | 3  |
| <i>cry1a</i>               | <0.00001                 | 3  | <0.00001                 | 3  |
| 6 dpf                      |                          |    |                          |    |
|                            | <i>gr</i> <sup>+/+</sup> |    | <i>gr</i> <sup>-/-</sup> |    |
|                            | P                        | A  | P                        | A  |
| <i>arntl1</i>              | <0.00001                 | 15 | <0.00001                 | 15 |
| <i>clock1a</i>             | <0.00001                 | 15 | <0.00001                 | 15 |
| <i>per1b</i>               | <0.00001                 | 21 | 0.001                    | 3  |
| <i>per2</i>                | -                        | 3  | <0.00001                 | 3  |
| <i>cry1a</i>               | 0.001                    | 3  | <0.00001                 | 3  |
| 12 dpf                     |                          |    |                          |    |
|                            | <i>gr</i> <sup>+/+</sup> |    | <i>gr</i> <sup>-/-</sup> |    |
|                            | P                        | A  | P                        | A  |
| <i>arntl1</i>              | 0.001                    | 9  | <0.00001                 | 15 |
| <i>clock1a</i>             | 0.005                    | 9  | <0.00001                 | 15 |
| <i>per1b</i>               | 0.006                    | 3  | <0.00001                 | 21 |
| <i>per2</i>                | <0.00001                 | 3  | 0.002                    | 3  |
| <i>cry1a</i>               | <0.00001                 | 3  | 0.013                    | 3  |

| Adults – Light entrainment     |                          |    |                          |    |
|--------------------------------|--------------------------|----|--------------------------|----|
|                                | Eyes                     |    |                          |    |
|                                | <i>gr</i> <sup>+/+</sup> |    | <i>gr</i> <sup>-/-</sup> |    |
|                                | P                        | A  | P                        | A  |
| <i>arntl1</i>                  | <0.00001                 | 9  | <0.00001                 | 9  |
| <i>clock1a</i>                 | 0.003                    | 15 | 0.008                    | 15 |
| <i>per1b</i>                   | <0.00001                 | 21 | <0.00001                 | 21 |
| <i>per2</i>                    | <0.00001                 | 3  | <0.00001                 | 3  |
| <i>cry1a</i>                   | <0.00001                 | 3  | <0.00001                 | 3  |
|                                | Liver                    |    |                          |    |
|                                | <i>gr</i> <sup>+/+</sup> |    | <i>gr</i> <sup>-/-</sup> |    |
|                                | P                        | A  | P                        | A  |
| <i>arntl1</i>                  | -                        | 6  | -                        | 6  |
| <i>clock1a</i>                 | -                        | 9  | -                        | 9  |
| <i>per1b</i>                   | <0.00001                 | 3  | <0.00001                 | 3  |
| <i>per2</i>                    | <0.00001                 | 3  | <0.00001                 | 3  |
| <i>cry1a</i>                   | <0.00001                 | 3  | <0.00001                 | 3  |
| <i>nr1d1</i>                   | <0.00001                 | 21 | 0.001                    | 21 |
| Juvenile – Feeding entrainment |                          |    |                          |    |
|                                | 35 dpf                   |    |                          |    |
|                                | <i>gr</i> <sup>+/+</sup> |    | <i>gr</i> <sup>-/-</sup> |    |
|                                | P                        | A  | P                        | A  |
| <i>arntl1</i>                  | 0.023                    | 15 | 0.006                    | 15 |
| <i>clock1a</i>                 | <0.00001                 | 9  | <0.00001                 | 9  |
| <i>per1b</i>                   | <0.00001                 | 9  | 0.002                    | 3  |
| <i>per2</i>                    | <0.00001                 | 15 | 0.015                    | 15 |
| <i>cry1a</i>                   | -                        | 15 | -                        | 3  |
| <i>nr1d1</i>                   | -                        | 21 | 0.006                    | 3  |
