# Supplementary material for: Feeding Entrainment of the Zebrafish Circadian Clock Is Regulated by the Glucocorticoid Receptor
Source: MDPI journal article supplement (doi:10.3390/cells8111342), 2019-10-29
Supplement: s1 [file s1]

**Table S1**  
**qPCR primers**

| Gene           | Forward (5'-3')          | Reverse (5'-3')        | Genbank acc. no. |
|----------------|--------------------------|------------------------|------------------|
| <i>clock1a</i> | CTGGAGGATCAGCTGGGTTAG    | CACACACAGGCACAGACACA   | NM_130957        |
| <i>arntl1a</i> | TAGAGCGCTGTTTGCTGATG     | GACCCGTGGACTTCAGTGAC   | NM_131578        |
| <i>per1b</i>   | CCGTCAGTTTCGCTTTTCTC     | ATGTGCAGGCTGTAGATCCC   | NM_001030183     |
| <i>per2</i>    | ATGTCGATGGCTTTAGGCAG     | CGAGACATCCAGAAGGTGCT   | NM_182857        |
| <i>cry1a</i>   | TCCGCTGTGTGTACATCCTC     | CAAACACTGCAGCAAAAACC   | NM_001077297     |
| <i>nr1d1</i>   | GCAATTCACCCAACAAATCAG    | CAGGCATGGACGCCATAGT    | NM_001130592     |
| <i>pck2</i>    | CTGTGTGCTCATCCAAACTCC    | GATCTCATAGCTGCACCAACG  | NM_213192        |
| <i>srebp1</i>  | GACACTTCTCTGGACACTCTG    | ATCGAACAGCCCAAACCTCC   | NM_001105129     |
| <i>rpl13a</i>  | TCTGGAGGACTGTAAGAGGTATGC | AGACGCACAATCTTGAGAGCAG | NM_198143        |
| <i>gapdh</i>   | GTGGAGTCTACTGGTGTCTTC    | GTGCAGGAGGCATTGCTTACA  | NM_001115114.1   |
| <i>rplp0</i>   | CTGAACATCTCGCCCTTCTC     | TAGCCGATCTGCAGACACAC   | NM_001161350     |
| <i>18s</i>     | ACCACCCACAGAATCGAGAAA    | GCCTGCGGCTTAATTTGACT   | KY486501         |
